# Supplementary material
Source: PubMed Central journal article supplement (PMC2544553)
Supplement: 0710997105_0710997105SI.pdf [file 0710997105_0710997105SI.pdf]

# Supporting Information

Kapelnikov *et al.* 10.1073/pnas.0710997105

## SI Methods

**Microarray Analysis.** To identify genes with significant changes in expression between groups, we first used MAS 5.0 software (Affymetrix). We selected genes that met the following criteria: i) were significantly present on at least two arrays of either unmated or mated groups and ii) had at least two expression values  $>50$ . This generated a dataset of 5,615 genes (see Fig. S1A). We then used Robust Multichip Average analysis (1) to simultaneously normalize data from all groups and used *t* tests to identify differentially expressed genes (ScoreGenes software tools, <http://compbio.cs.huji.ac.il/scoregenes/>) (2). Genes with a *p* value  $<0.05$  were considered differentially expressed (432 genes, Table S2).

Results from real-time or semiquantitative PCR validated our reported microarray results for 16 individual genes identified in the oviduct as: (i) present/no change (*CG7777*, *CG12251*, *CG4019*, *period*, *cycle*, *vriIle*, *clock*; *pyruvate dehydrogenase phosphatase*, *cryptochrome*, *upheld*, *armadillo*, and *dystropin*), (ii) absent (*limpet*), or (iii) increased after mating (*juvenile hormone acid methyltransferase*, *cecropin*, *drip*, *timeless*).

Functional analysis was performed by using DAVID (<http://david.abcc.ncifcrf.gov/gene2gene.jsp>), FlyMine (<http://www.flymine.org/release10.0/aspect.do?name=Gene%20Ontology>), and FuncAssociate (3) (<http://llama.med.harvard.edu/cgi/func/funcassociate>), which calculate the statistical probability for the representation of genes within a given Gene Ontology (GO) category relative to the total number of genes annotated with the same function. GO terms were considered as significantly enriched after correction for multiple hypothesis testing (Table S1).

**Hierarchical Clustering.** To examine whether the experimental groups (unmated and mated arrays) classify to different groups on the basis of their expression profiles, we used DoublePCluster (part of the ScoreGenes package). DoublePCluster is an agglomerative hierarchical model-based unsupervised biclustering approach in which the genes and the samples are both clustered according to their expression profiles ([http://leibniz.cs.huji.ac.il/tr/acc/2003/HUJI-CSE-LTR-2003-80\\_pcluster.pdf](http://leibniz.cs.huji.ac.il/tr/acc/2003/HUJI-CSE-LTR-2003-80_pcluster.pdf)). Briefly, this procedure uses a generative probabilistic model, which creates a hierarchy where genes (resp. samples) are combined together if they show similar expression levels in each cluster of samples (resp. genes). This analysis demonstrates that unmated and mated arrays cluster separately ( $P < 4.62 \times 10^{-17}$ ; see Fig. S1B).

We next used PCluster (also in the ScoreGenes package) to cluster genes based on differences in expression patterns between mated and unmated samples (for example, in refs. 4 and 5). PCluster, also a model-based agglomerative clustering approach, assigns genes into the same cluster if they have similar distributions of expression values across preclassified groups of samples (here unmated and mated classes; see Fig. S1C). We highlight in the manuscript two clusters that exhibited the greatest differences in expression between unmated and mated females (fold change  $\geq 1.5$ ). The output files were visualized with Java Treeview (<http://taxonomy.zoology.gla.ac.uk/rod/treeview.html>).

**Comparison to Other Datasets.** To determine which mating components regulate gene expression changes in the oviduct, we compared our oviduct dataset (432 significantly up- or down-regulated genes with a whole-body dataset of 1780 genes) (Table S2) (6). To test whether the percentage of genes shared between the two datasets (4%, 66/1,780) is significant, we compared the

whole-body dataset and the oviduct dataset with the following datasets: 1) nuclear morphogenesis (575 genes) (7); 2) transcripts enriched in the mushroom body (113 genes) (8) that are not related to our datasets; and 3) transcripts responsive to ecdysone at the onset of morphogenesis (743 genes) (9), which may be of relevance to the mating response. We found that the whole-body dataset and the oviduct dataset shared a small percentage of genes with dataset 2 (2.6%, 3/113; 2.6%, 3/113 genes, respectively) and with dataset 3 (17.6%, 131/743 and 5.5%, 41/743 genes, respectively). Moreover, only 10 of the 66 genes that are shared between the oviduct and the whole-body datasets are also shared with dataset 3 but not with datasets 1 and 2.

To evaluate the significance representation of the genes differentially expressed after mating in the female oviduct, we compared our dataset of differentially expressed transcripts and proteins (449; 432 genes and 17 proteins) with the following datasets: 1) testis soma, ovary soma, testis, and ovary (856, 893, 1692, and 453 genes, respectively) (10); 2) transcripts enriched in the lower reproductive tract at 3 h after mating (1603 genes) (11); 3) Malpighian tubule (1,456 genes) (12); and 4) mouse oviduct (43 genes) (13). We also mined ESTs available in UniGene of different relevant body parts [head (8,139 genes), fat body (3,033 genes), hemocytes (2,365 genes) and salivary gland (1,370 genes)] and immune-responsive genes (400 genes) (14). We used PCluster in ScoreGenes (2) (<http://compbio.cs.huji.ac.il/scoregenes/>) to compare annotation patterns as described above.

**Construction and Visualization of Interactome Networks.** A composite *Drosophila* protein–protein interaction map, with 7,590 links between 5,394 proteins, was created from the union of three published interaction maps (15–17). These studies each reported protein–protein interactions from high-throughput yeast two-hybrid and coimmunoprecipitation assays that passed a series of quality control measures as described. We excluded from our composite network low quality interactions from these studies [specifically, we used only the subset with confidence score  $\geq 0.5$  from (15) and classes A–D from (17)]. The contributions of individual datasets to the full network are listed in Table S4A. Table S4B provides a complete list of interactions and sources for each data point contained in the composite network with quality scores from the original publications where available.

We also constructed an augmented network including interologs from published protein–protein interaction datasets for human (18, 19), worm (20) (excluding the “Noncore” dataset), and budding yeast (21) (“FYI” dataset), for a total of 10,084 links between 6,019 proteins (totals for each are listed in Table S4A). Interologs are inferred protein–protein interactions based on experimentally determined interactions between homologous protein pairs in other species. Homologous groups were identified by using InParanoid (22) (<http://inparanoid.cgb.ki.se/>; April 15, 2005 release) and were not further filtered for joint percent identity or percent length along the proteins. A complete list of the interologs and their data sources is included in Table S4B.

Integrated networks of protein–protein and interolog interactions, supplemented with genetic interactions between pairs of *Drosophila* genes (extracted from FlyBase <http://flybase.bio.indiana.edu/>), were visualized (Fig. 3 and Fig. S2 C and D) by using Cytoscape (23) version 2.5.2 (<http://www.cytoscape.org/>). SI File 1 provides a Cytoscape session file containing the network data shown in Fig. S2 C and D. Table S4B includes a complete list of all genetic interactions used. The full network can be

explored interactively online by using the web-based network browser N-Browse (24) (<http://www.gnetbrowse.org>), which also provides additional network data such as predicted miRNA-target relationships from PicTar (25).

**Analysis of Interactome Networks.** We used protein interaction data from *Drosophila* and inferred interactions from other species (interologs) to characterize the functional relatedness of subnetworks containing the different sets of oviduct proteins and transcripts that we identified by proteomic and microarray analyses (Table S5). For each set, we calculated the average shortest distance, characteristic path length (CPL), and mutual clustering coefficient ( $C_{vw}$ ) between all possible pairs of proteins in the subnetwork. Mutual clustering is a measure of neighborhood cohesiveness, and reports the degree of mutual association between neighbors of any pair of proteins (26). Proximity in the protein interaction map (low CPL) and neighborhood cohesiveness (high  $C_{vw}$ ) between pairs of proteins are indicative of functional relatedness. CPL was calculated by using the Floyd-Warshall algorithm (27);  $C_{vw}$  was calculated as described (26). To determine the significance of topological parameters and to control for any potential false positive interactions or systematic bias within the composite network, we performed statistical analysis of observed parameters relative to cohorts of randomly sampled gene sets from the full network (described below).

For each set of proteins (present, up-, or down-regulated) or transcripts (differentially expressed, up-, or down-regulated) we analyzed two subnetworks: one comprising all direct interactions within the set and the nearest neighbor network (NNN) for each set (comprising all set members, their first-degree neighbors, and all interactions between any of these). We repeated these analyses for four variants of the full interactome network: the *Drosophila* compendium interactome network, the same network supplemented with interologs, and each of these with ribosomal and vacuolar ATPase genes removed.

The statistical significance of topological parameters for each oviduct subnetwork was evaluated against comparable gene sets selected at random from the full interactome map for each network variant. A z-score was calculated to determine significance of the observed parameter value vs. the distribution in 1,000 random sets. For NNNs, random sets were generated by selecting from the interactome the same number of genes as the starting test set and drawing in all interaction partners as well as interactions between these neighbors. To control for potential bias in the yeast two-hybrid (Y2H) data, we repeated the analysis by using random sets containing the same ratio of Y2H “baits” and “preys” as present in the test sets for the *Drosophila* interactome (we could not perform this control on the interactome including interologs because we did not have directional information for all edges from the expanded network). Table S5 provides complete summary statistics and Fig. S2A and B shows a graphical summary of these data. For reference, CPL and  $C_{vw}$  across the full networks were in the range of 5.9–6.4 and  $<10^{-7}$ , respectively.

Both CPL and  $C_{vw}$  revealed significant connectivity among subnetworks for the two sets of proteins identified by multidimensional protein identification technology (MudPIT) (Table S5). For the first set (the set of all 89 expressed proteins), 56 were present in the interactome map. These showed a CPL of 5.16 vs. 6.41 for comparable random sets (z-score =  $-3.55$ ), and  $C_{vw}$  was significantly higher compared with random sets of 56 (0.16 vs. 0.03; z-score = 8.25). For the second set (the set of 16 up-regulated proteins), for the 12 present in the interactome vs. random sets of 12, CPL was 3.91 vs. 6.36 (z-score =  $-3.11$ ), and  $C_{vw}$  was 0.69 vs. 0.03 (z-score = 12.23). Subnetworks expanded to include interologs gave similar results (Table S5). NNNs, with or without interologs, showed similar CPL but less difference in  $C_{vw}$  relative to random sets, indicating less functional cohesiveness than the core sets

(Table S5). Excluding the 11 ribosomal and vacuolar ATPase subunits gave essentially the same results (Table S5).

For the sets analyzed from the 432 differentially expressed transcripts identified by microarray analysis, no significant trend was observed compared with random sets in any of the network variants (Table S5).

**Proteomic Assays.** Proteins were isolated from the phenol-ethanol supernatant obtained after precipitation of DNA from TRIzol according to the manufacturer’s protocol (three independent biological samples, each consisting of pooled tissues from 400–500 females, were created for unmated and mated replicates). Total protein extract (100  $\mu$ g in 8 M urea and 100 mM ammonium bicarbonate) was reduced (10 mM DTT, incubated at 60°C for 30 min) and alkylated (10 mM iodoacetamide, at room temperature for 30 min). The denatured and alkylated protein mixture was diluted 3-fold with water, followed by digestion overnight at 37°C by using modified trypsin (Promega) at a 1:100 enzyme-to-substrate ratio. Trypsinized total protein extracts were desalted with a  $C_{18}$  tip (Harvard), eluted with 90% acrylonitrile (ACN), dried, and dissolved in 0.1% formic acid. Aliquots of the peptides were analyzed by MudPIT (28) with off-line SCX column (LC Packings) by using nine salt steps of 10, 20, 40, 60, 80, 100, 150, 250, and 500 mM ammonium acetate in 2% ACN with 0.1% acetic acid. The eluted fractions were dried again by vacuum centrifugation and dissolved in 0.1% acetic acid. These fractions were further resolved by reverse-phase chromatography on 0.1  $\times$  300-mm fused silica capillaries (J&W, 100 micrometer ID) packed with POROS R2–10 reversed phase material (Applied Biosystems). The peptides were eluted with linear 80 min gradients from 5 to 95% acetonitrile containing 0.1% acetic acid at flow rates of  $\approx 0.4$   $\mu$ l/min. Mass spectrometry was performed with ion-trap mass spectrometers (LCQ-DecaXP, Thermo) operated in the positive mode by using repetition of full MS scan followed by fragmentation of the three most dominant ions selected from the first full MS scan.

The mass spectrometry data were clustered and analyzed and identified by Pep-Miner (29) and Sequest 3.1 software (Thermo) against the Insects section of the NCBI NR database. Pep-Miner organized the data, reduced its volume, improved the spectra quality, and increased the confidence in identification results. MS/MS data from the different chromatographs were treated in a unified manner. Moreover, by clustering at the raw data level, Pep-Miner enabled us to perform a precise comparison between unmated and mated oviducts, both at the raw data level and at the identified peptide level.

A peptide was considered as high quality if its Pep-Miner identification score was  $>80$ , the Sequest Xcore of 1.5 for singly charged peptides, 2.5 for doubly charged peptides, and 3 for triply charged peptides, and a normalized correlation score ( $\Delta C_n \geq 0.1$ ). In addition, the correctness of identification of individual peptides was assessed visually by a trained operator. Using these tools, we detected a total of 178 proteins in unmated and mated oviducts.

**Proteomic Analysis.** Some parameters, such as the peptide hit number, spectral sampling, and the number of peptides per protein (30–33), can be considered as indicators for protein abundance in the analyzed sample. To determine the direction (increase or decrease) of changes in protein abundance we used the number of peptides per identified protein as a semiquantitative measure of protein abundance. Our approach was to perform a pair-wise comparison, that is, to compare the relative abundance of a protein in mated vs. unmated oviducts.

We first filtered the detected proteins for reproducibility and high quality. We selected proteins that met the following criteria: (1) had at least two different peptides with Pep-Miner identification score  $>80$ , the Sequest Xcore of 1.5 for singly charged peptides, 2.5

for doubly charged peptides, and 3 for triply charged peptides, and  $\Delta C_n \geq 0.1$  per identified protein in at least two replicates; and (2) showed the same direction of regulation in at least two replicates from either unmated or mated groups. This generated a dataset of 89 proteins of 178 that were identified in the oviducts of unmated and mated females (Table S3B).

We further filtered the dataset to select proteins that at least 2/3 replicates of unmated and at least 2/3 replicates of mated showed the same direction of change (i.e., increase vs. decrease). We compared the relative abundance of each protein in our dataset (89 proteins) in mated vs. unmated oviducts. We then average the relative abundance for each replicate that showed the same direction of regulation as follows:

$$\frac{1}{3} \sum_{i=1}^3 \frac{\text{mated}_i}{\text{unmated}_i}, \text{ where } i = \text{replicate number } 1,2,3. \quad [1]$$

Proteins that showed (1) the same direction of regulation in at least two replicates of unmated and mated groups ( $>4/6$ ) and (2) an increase or decrease of at least 2-fold were considered differentially expressed proteins. This generated a dataset of 17 differentially expressed proteins of 89 that were identified in the oviducts of unmated and mated females and met the above criteria (Table S3A).

**SDS/PAGE and Western Blot Analysis.** To validate that the proteins detected by MudPIT are differentially expressed, extracts of 60 oviducts from unmated and mated females were loaded and separated by SDS/PAGE. Proteins were blotted by using primary antibodies against: Coracle (Developmental Studies Hybridoma Bank), Adducin (DSHB), Neuroglian (M. Hortsch, University of Michigan, Ann Arbor, MI), Mlp84B (M. Beckerle, University of Utah, Salt Lake City), and Na pump  $\alpha$  subunit (DSHB). Proteins were incubated with secondary antibodies and visualized by enhanced chemiluminescence. The membrane was then scanned, and the signal intensity of each band was determined by using Image J (1.37d, National Institutes of Health) software. Four independent biological preparations of unmated and mated oviducts were performed for each of the selected proteins. Relative protein levels in mated oviducts vs. unmated oviducts were then calculated (see Table S3C).

**Comparison of Proteomic and Genomic Datasets.** To match genes represented on microarrays with corresponding gene products identified in proteomic experiments, we compared the proteomic (89 proteins) and genomic (5,615 present transcripts) datasets. We then determined: 1) whether transcripts were observed for proteins detected in the oviduct; and 2) whether differentially expressed proteins also had differentially expressed transcripts as described (11). Briefly, we categorized the identified proteins as follows: proteins with transcript present in unmated and mated female were scored as positive, proteins that did not have a corresponding transcript in unmated or mated female were scored as negative, and proteins with transcript in unmated or mated female were scored as intermediate.

**In Situ Hybridization.** Digoxigenin (DIG)-labeled sense and anti-sense riboprobes were prepared from linearized plasmids by using a T3 RNA transcription kit (Roche) according to the manufacturer's instructions. The *cecA1* riboprobe was derived from Bluescript plasmid k-7 bearing the *cecA1* cDNA insert (34) provided by D. Hultmark (Umeå University, Umeå, Sweden). Unmated and mated females at 3 h after mating were fixed in 4% paraformaldehyde in

PBS containing 1% Triton X-100 for 1 h, rinsed 3 times (10 min each time) in PBS containing 0.1% Triton X-100 (PBST), and incubated overnight in 25% sucrose in PBS at 4°C. Fixed flies were rinsed in PBST and thereafter had their wings and legs removed before embedding into optimal cutting temperature freezing medium (TissueTek) and frozen at  $-20^\circ\text{C}$ . Cryosections of 10  $\mu\text{m}$  thick were thaw-mounted on SuperFrost plus slides (Menzel-Glaser), air dried for 20 min, and stored in  $-80^\circ\text{C}$  until used. Hybridizations were carried out as described (35). Briefly, sections were covered with hybridization solution containing DIG-labeled riboprobe and incubated overnight. Hybridized sections were rinsed, blocked, and then incubated with anti-DIG alkaline phosphatase-conjugated antibody (Roche). Hybridized DIG-labeled probes were visualized with the HNPP Fast Red fluorescence detection set (Roche). Note that the *cecA1* RNA probe prepared can cross react with both *cecA2* and *cecB*.

**Analysis of *Pep<sub>x</sub>-GFP* Localization.** Three-day-old unmated *cec-GFP* or other *Pep<sub>x</sub>-GFP* females were rapidly screened under UV light and GFP filter to identify individuals with the most closely matched fluorescence intensity of the spermathecae (which fluoresce strongly and are easily seen through the abdomen cuticle), to normalize fluorescence intensity, and to ensure that flies did not encounter immune challenge. Selected females were used to examine the spatial distribution of antimicrobial peptides in the reproductive tract, or used for mating experiments as described in Material and Methods, sample preparation section. Reproductive tracts were dissected on ice in PBS, washed in a drop of PBS, and mounted in antifade media (36) on a multiwell glass slide (Hendley). Each slide held reproductive tracts from unmated and mated females.

**Microscopy.** Hybridized sections and reproductive tracts were viewed with a Zeiss 510 laser scanning confocal microscope by using an  $\times 20$  objective with additional zooming. Fluorescence was detected by using an argon excitation laser 488 nm and the appropriate filter sets: 650 nm for HNPP Fast Red fluorescence and 505–530 nm for GFP. Optical sections from different focal plans of each reproductive tract region (lateral oviducts, common oviduct, seminal receptacle and spermathecae) were collected and projected as a reconstructed three-dimensional image by using LSM image browser (version 3,5,0,376) software. Image collection and parameter settings were identical for each of the different reproductive tract regions analyzed.

**Evaluation of Fluorescence Intensity Level.** Fluorescence of *cecA1*-hybridized sections and *Pep<sub>x</sub>-GFP* female reproductive tracts was quantified by using Image J by local mean fluorescence intensity level (LMFIL) approach as described (37). The LMFIL value quantifies the mean intensity at five different locations within the selected reproductive tract region. One-way ANOVA (SPSS 15.0) was used to measure the difference in *cec-GFP* intensity level between unmated and mated females as in (37). Same protocol was used to measure the difference in *cecA1* intensity level in hybridized sections of unmated and mated females.

**SI File 1.** This Cytoscape 2.5.2 session file, available at [http://xerxes.bio.nyu.edu/~kris/manuscripts;Kapelnikov\\_2008/](http://xerxes.bio.nyu.edu/~kris/manuscripts;Kapelnikov_2008/), contains a description of the two NNN subnetworks shown in Fig. 3 and Fig. S2 C and D that can be viewed using Cytoscape network visualization software. See the Cytoscape website for downloads and other information, including Java version requirements (<http://www.cytoscape.org>).





**B**

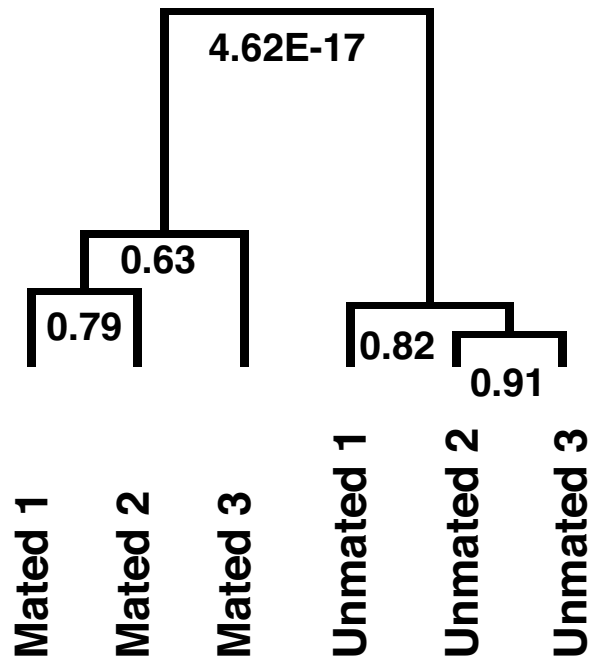

Fig. S1 cont.

C

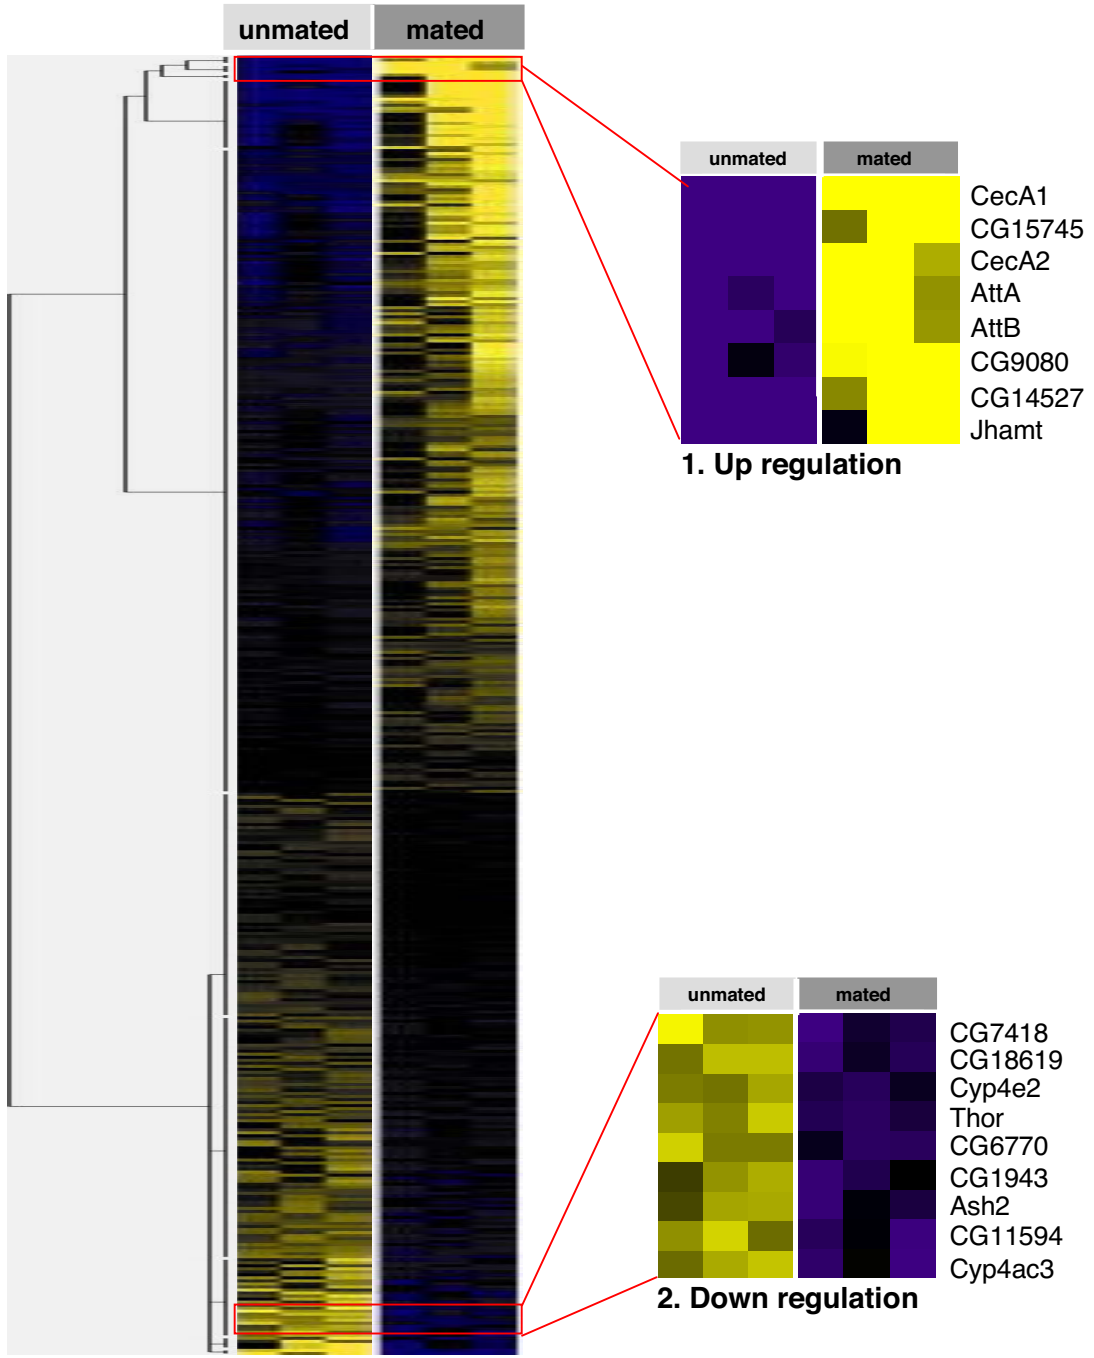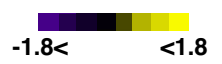

Fig. S1 cont.

D

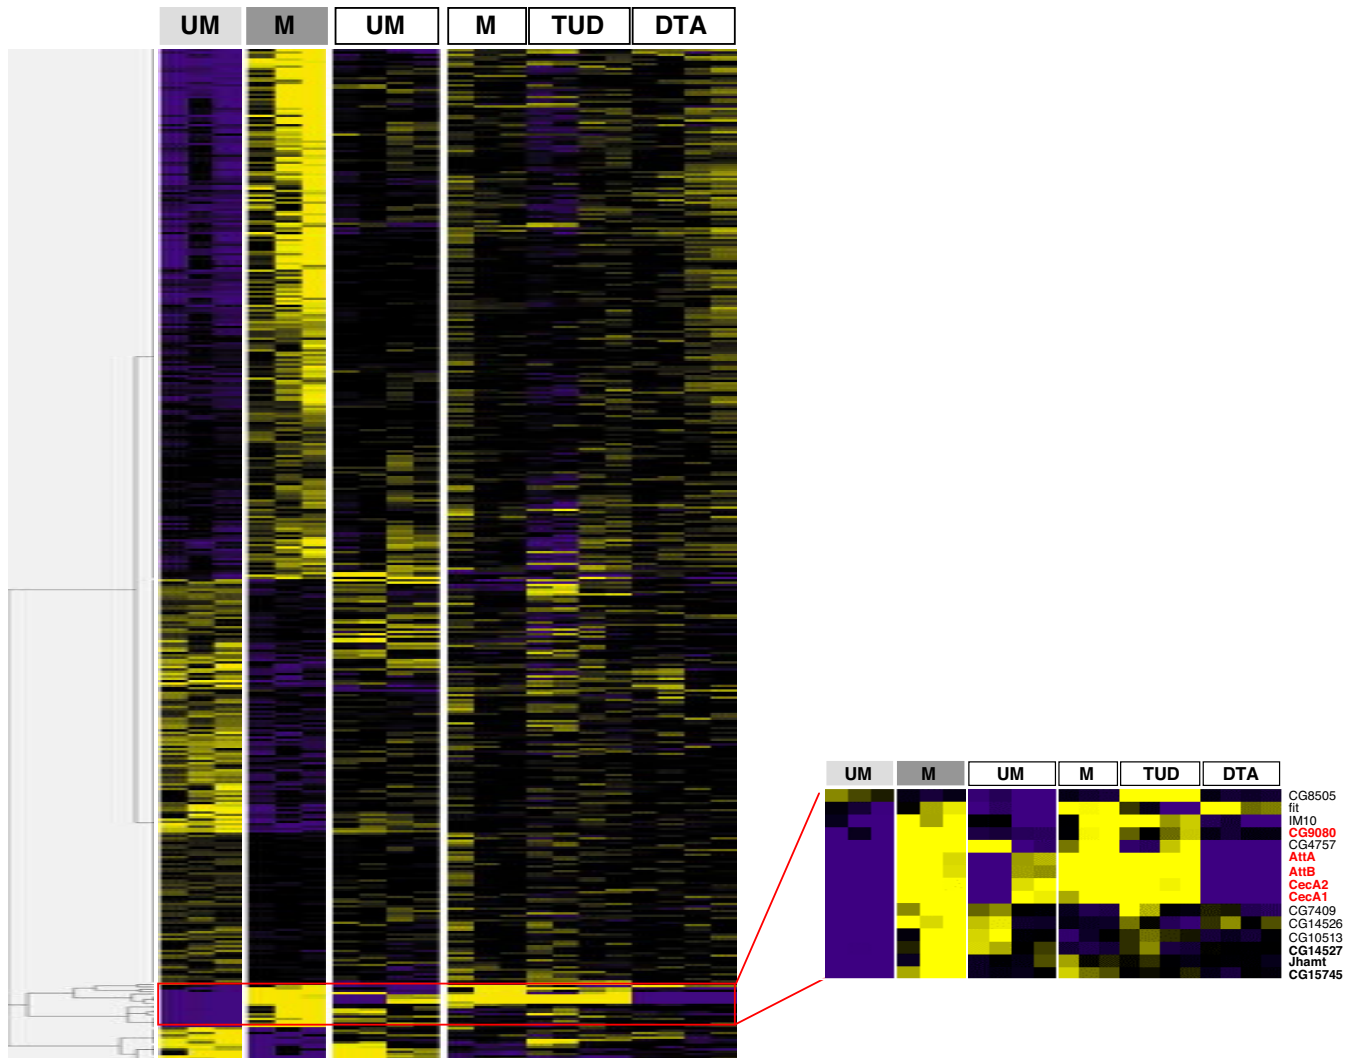

- UM** Oviducts of unmated females
- M** Oviducts of females mated to wild type males
- UM** Whole body of unmated female
- M** Whole body of females mated to wild type males
- TUD** Whole body of females mated to spermless males
- DTA** Whole body of females mated to males lacking sperm and Acps

-1.8 < <1.8

Fig. S1 cont.



A

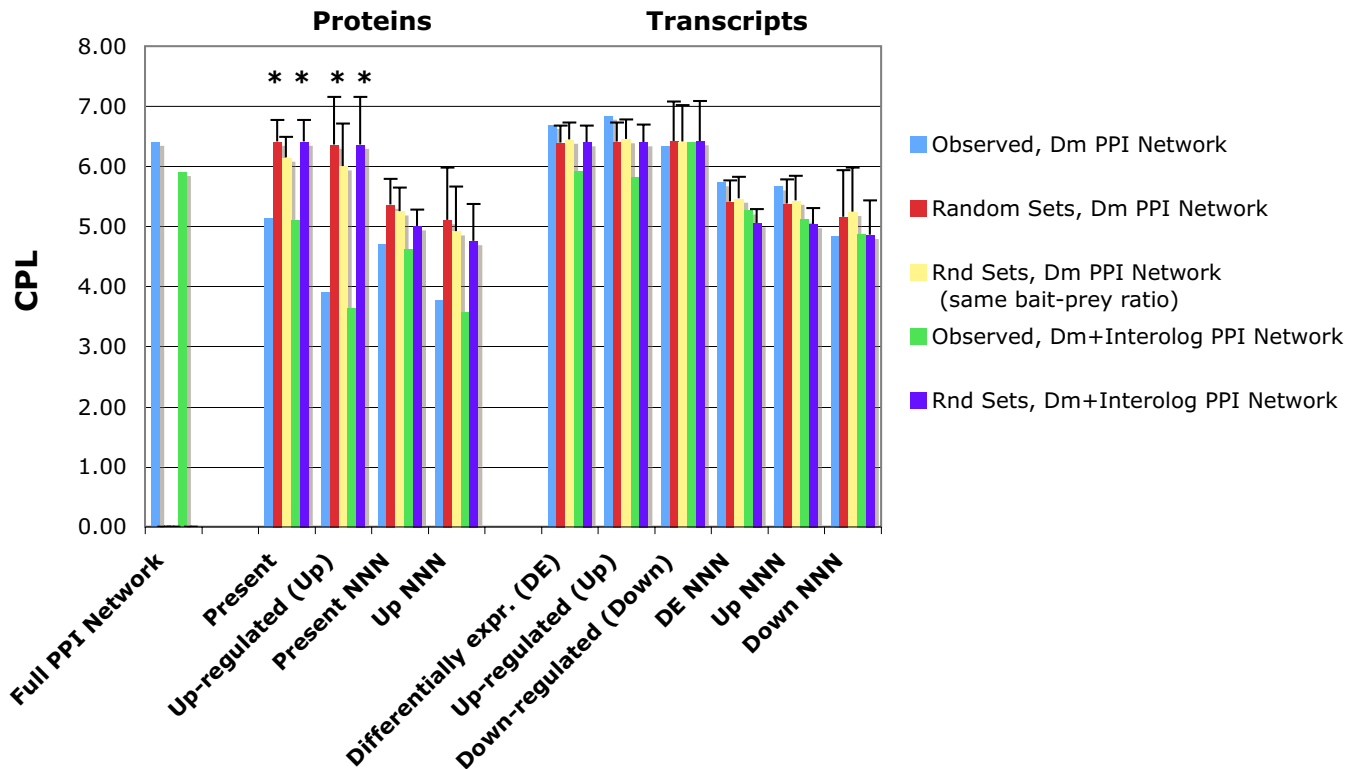

**Fig. S2.** Analysis of molecular networks for mating-responsive gene products in the oviduct based on a composite molecular interaction map for *Drosophila*. (A and B) Bar charts of (A) characteristic path length (CPL) and (B) mutual clustering coefficient ( $C_{ww}$ ) in protein-protein interaction subnetworks for oviduct-expressed protein and transcript sets vs. random sets (see Table S5 for raw data). Table S5 provides raw data and statistics for these networks and variants that exclude ribosomal and vacuolar  $H^+$  ATPase subunits (not shown here). Subnetworks were drawn from the *Drosophila* protein-protein interaction ("Dm PPI") network or the Dm PPI network supplemented with interologs from human, worm, and yeast ("Dm+Interolog PPI"). See Table S4 for details on networks. Left-hand set of bars, statistics across each full PPI network. Middle set of bars, subnetworks of proteins detected by MudPIT. Right-hand set of bars, subnetworks of transcripts detected by microarray. All gene products ("Present"), just those whose expression changed significantly after mating ["Differentially Expr. (DE)", "Up-regulated (Up)", "Down-regulated (Down)"], and nearest neighbor networks (NNNs) for each of these were compared with 1000 subnetworks generated by using similarly sized sets of proteins selected at random from the corresponding interactome map. Asterisks indicate statistically significant deviation of observed vs. random sets ( $z$ -score  $>3$ , corresponding to a  $P$  value  $<0.001$ ). (C and D) Nearest neighbor networks (NNNs) for mating-responsive gene products in the oviduct: (C) NNN for up-regulated proteins detected by MudPIT, (D) NNN for differentially expressed transcripts detected by microarray. Edges, Protein-protein interactions from *Drosophila* (blue), interologs (violet), or both (black) or genetic interactions (green). Nodes, proteins or genes. Node color, expression of mRNAs in the oviduct measured by microarray [reproducibly detected in either unmated or mated samples (yellow), up-regulated on mating (red), down-regulated on mating (green), not detected (gray)]. Node borders, proteins detected by MudPIT [not detected (circles), present (squares), up-regulated (diamonds)]. *SI File 1* ([http://xerces.bio.nyu.edu/~kris/manuscripts/Kapelnikov\\_2008/](http://xerces.bio.nyu.edu/~kris/manuscripts/Kapelnikov_2008/)) contains a Cytoscape-compatible version of these subnetworks. The full networks can be browsed interactively online by using N-Browse (<http://www.gnetbrowse.org>).

**B**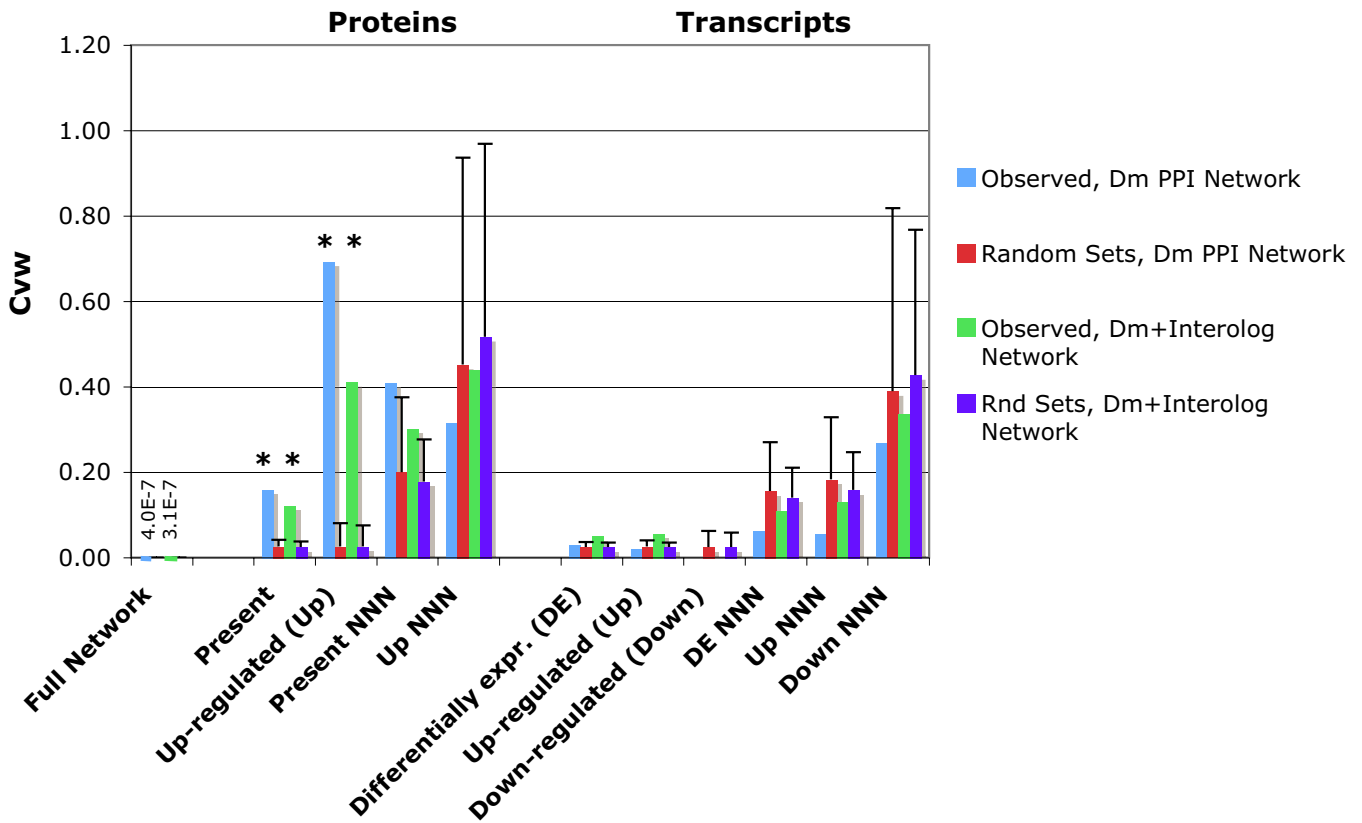

Fig. S2 cont.

C

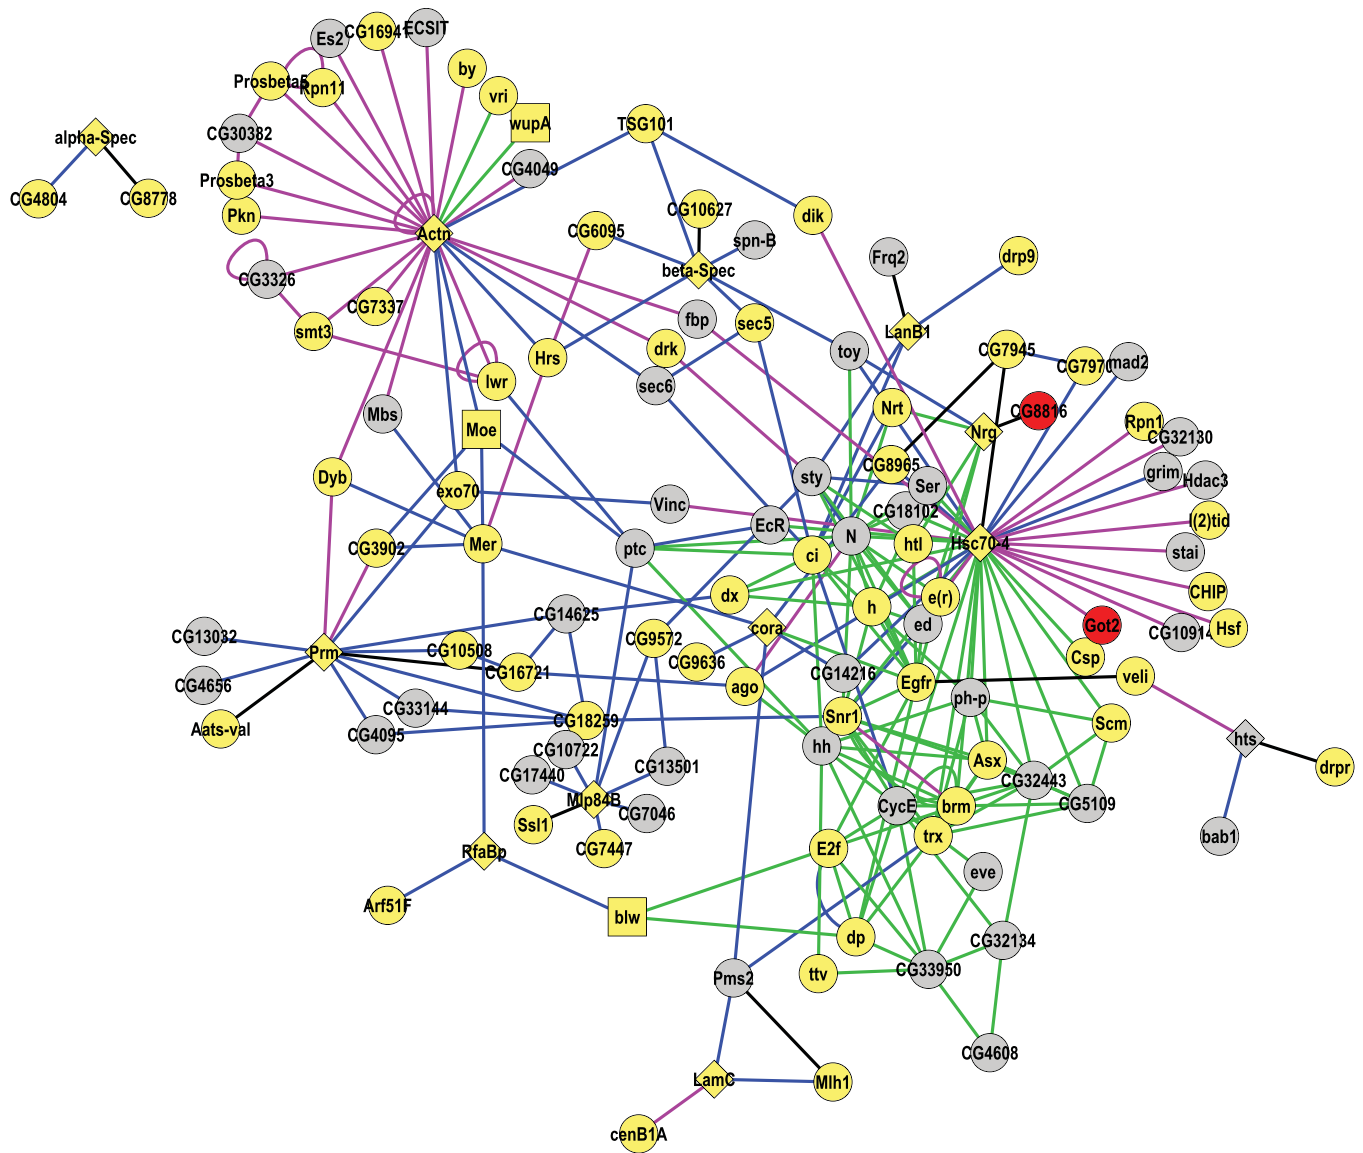

**Node shape and outline**

- ◆ Protein up-regulated (MudPIT)
- Protein present (MudPIT)
- Not detected by MudPIT

**Node color**

- mRNA present in either mated or unmated
- mRNA up-regulated upon mating
- mRNA down-regulated upon mating
- mRNA not detected

**Edges**

- Protein-protein interactions (PPI) from *Drosophila*
- Inferred PPI from interologs
- *Drosophila* PPI and Inferred PPI from interologs
- Genetic interactions

Fig. S2 cont.

D

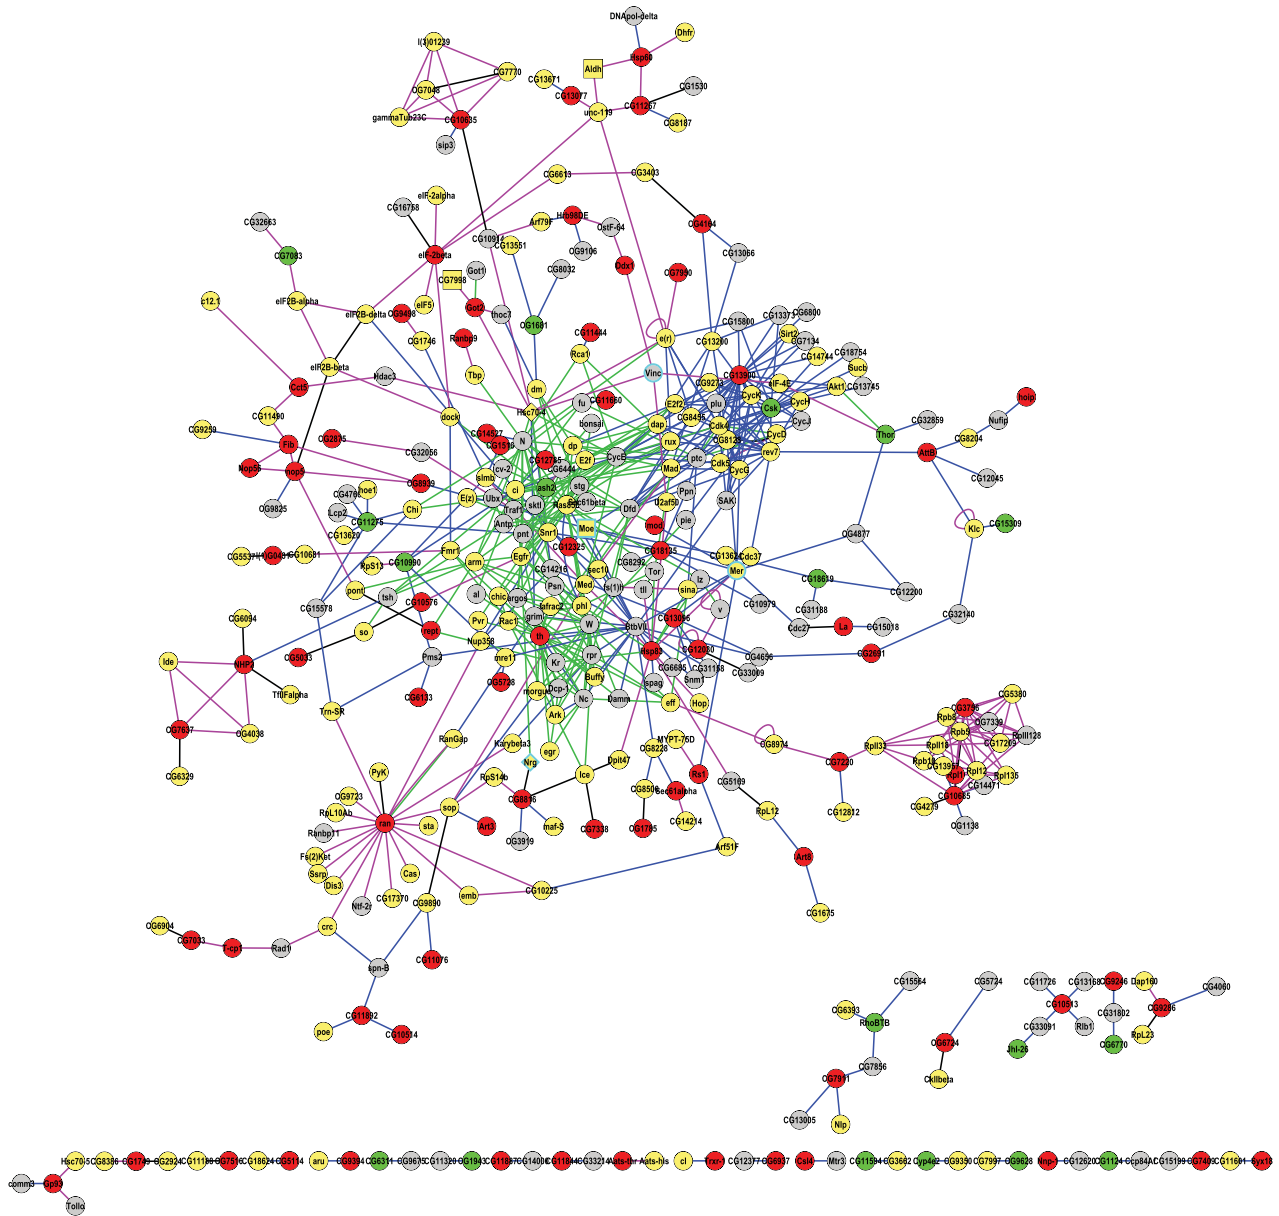

**Node shape and outline**

- Protein present (MudPIT)
- Not detected by MudPIT

**Node color**

- mRNA present in either mated or unmated
- mRNA up-regulated upon mating
- mRNA down-regulated upon mating
- mRNA not detected

**Edges**

- Protein-protein interactions (PPI) from *Drosophila*
- Inferred PPI from interologs
- PPI from *Drosophila* and Inferred PPI from interologs
- Genetic interactions

Fig. S2 cont.



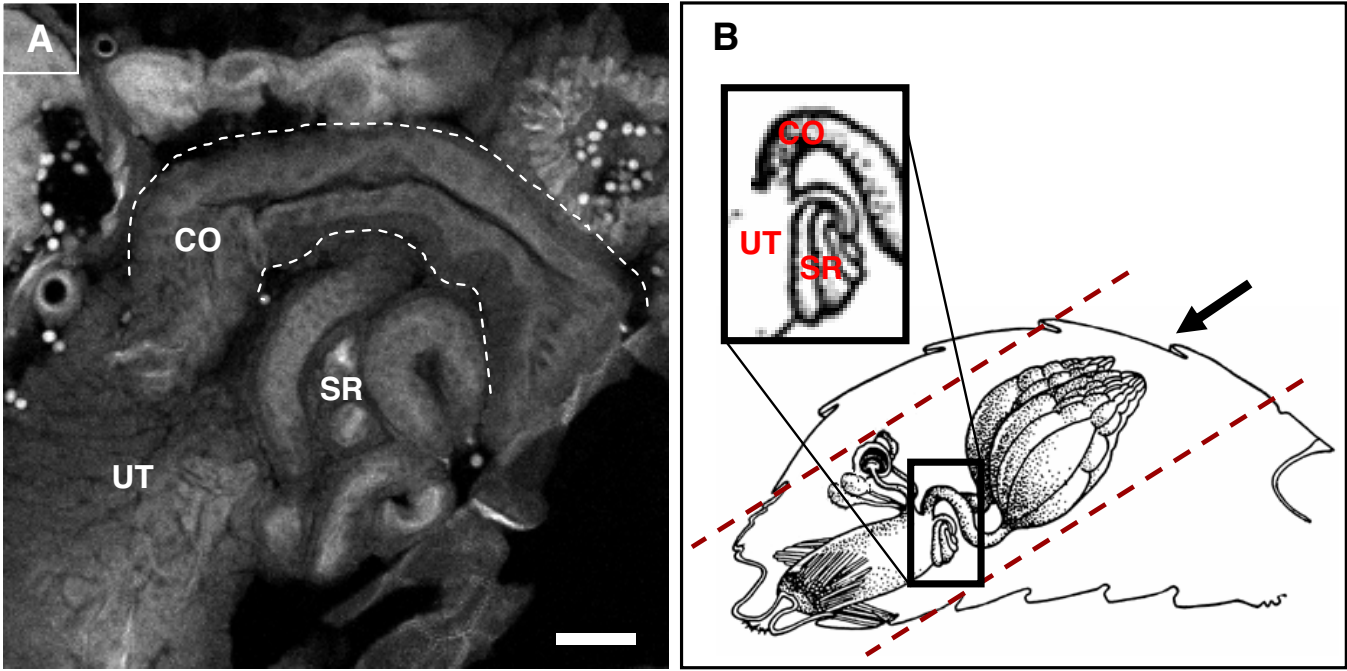

**Fig. S4.** Cec hybridization in the female reproductive tract. Control DIG-labeled sense *cecA1* probe hybridized to cryosection of unmated female (A); (Scale bar, 20  $\mu\text{m}$ );  $n = 10$  females; (B) Schematic of female reproductive system (adapted from FlyBase image FBim0000077) representing the direction of sectioning. UT, uterus; SR, seminal receptacle; CO, common oviduct.

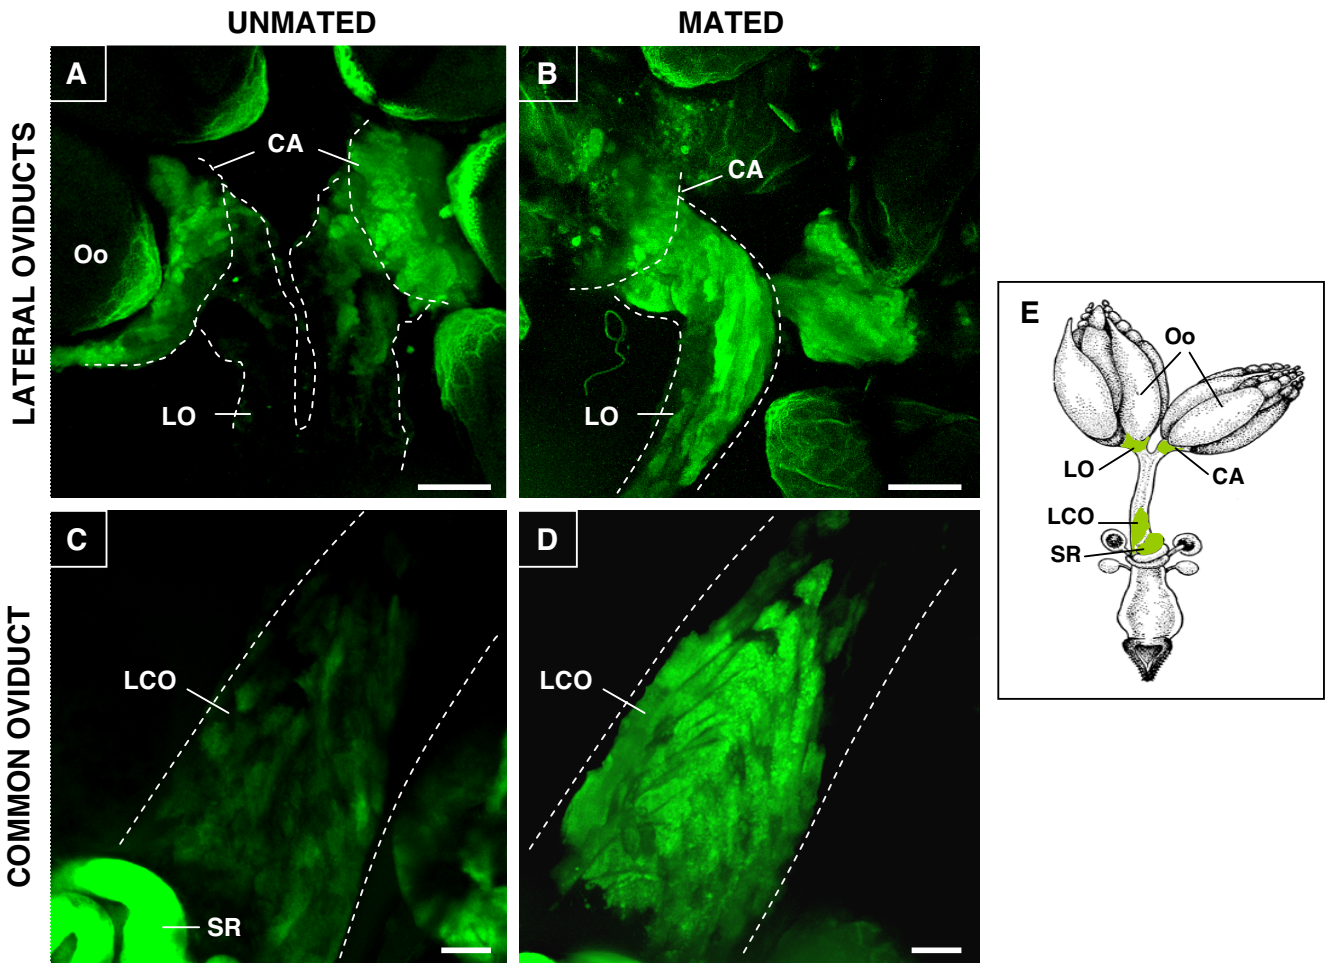

**Fig. S5.** The spatial localization of a reporter for Cec protein differs from that of the *cec* transcript, but shows the same after-mating induction pattern. Distribution of Cec-GFP in the lateral oviducts of (A) unmated and (B) mated female at 3 h after mating; and in the lower part (dorsal side) of the common oviduct of (C) unmated and (D) mated female. Cec-GFP is excluded from the middle part of the common oviduct (C–E). See also Fig. S6A (g) (zones I and II). Note the high intensity of Cec-GFP fluorescence in the lower common oviduct of mated vs. unmated female (unmated =  $29.2 \pm 2.8$ ; mated =  $44.9 \pm 3.13$ ;  $P < 0.0001$ ); To rule out possible male contribution to the after mating fluorescence signal, we analyzed *cec-GFP* transgenic females mated to WT males, and WT females mated to *cec-GFP* transgenic males. The latter had no effect in female tissues (not shown), suggesting a solely female contribution to the after-mating oviduct immune response. (E) Schematic of female reproductive tract (adapted from FlyBase image FBim6932540). Oo, oocyte; CA, calyx; LO, lateral oviducts; LCO, lower common oviduct; SR, seminal receptacle. (Scale bar, 50  $\mu\text{m}$  in A–D);  $n > 36$  females for each treatment.

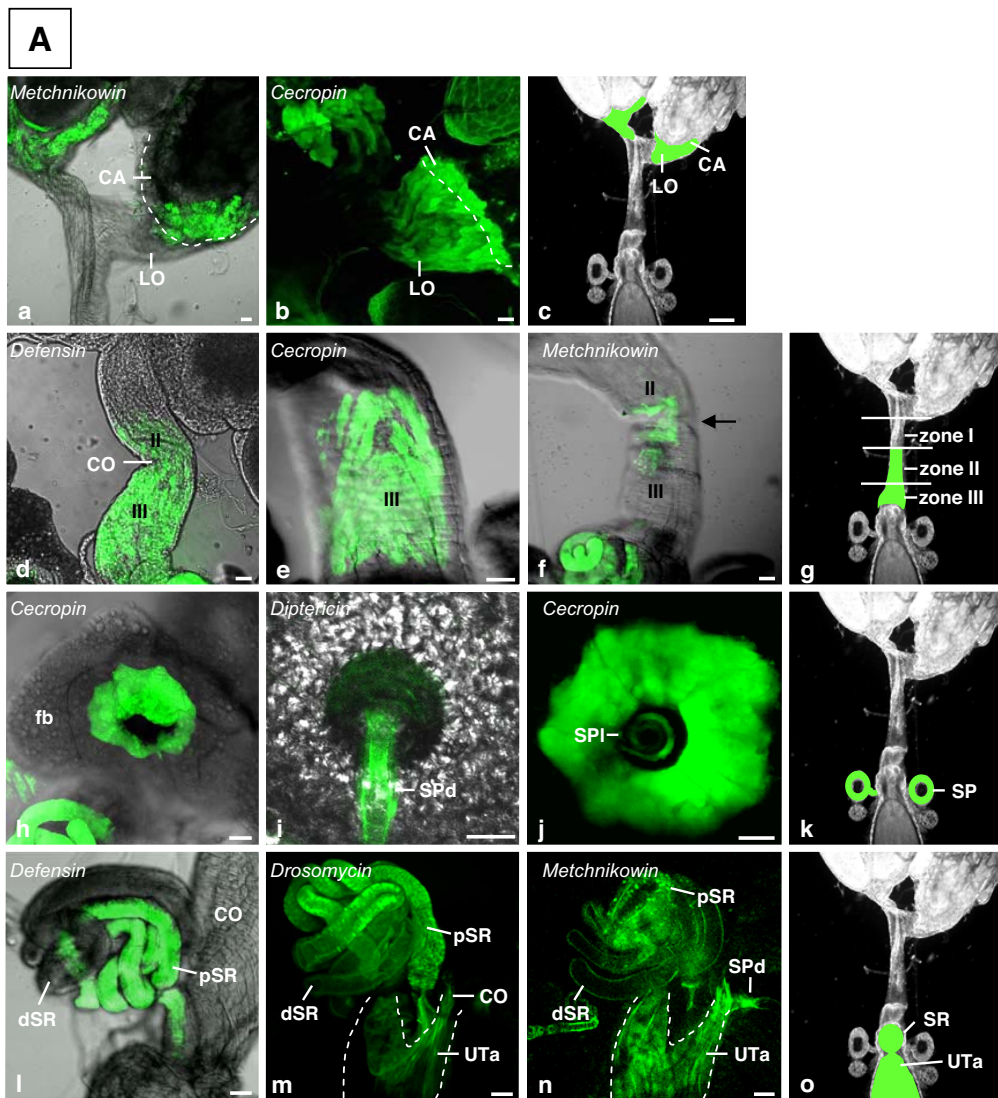

**Fig. S6.** Antimicrobial peptides are expressed throughout the female reproductive tract but each antimicrobial peptide has a unique expression pattern. (A) *Pep<sub>x</sub>-GFP* flies express GFP in different regions of female reproductive tract. Selected confocal images shown represent the localization of antimicrobial peptides within: (a-c) the calyx (CA) and lateral oviducts (LO); (d-g) common oviduct (CO) and the three zones observed within the CO (I, II and III); (h-k) spermatheca (SP); and (l-o) seminal receptacle (SR) and uterus (UT). Also shown are models of reproductive tract that summarize the topographical distribution of antimicrobial peptides in the: CA and LO (c), different zones of the CO (g), SP (k) and SR and UT (o). Details on specific GFP patterns: (a) Metchnikowin-GFP fluorescence in the CA but not in the LO; (b) Cecropin-GFP fluorescence in the CA and the LO; (d) Defensin-GFP fluorescence in Zones II and III of the CO; (e) Cecropin-GFP fluorescence in a subpopulation of epithelial cells in Zone III of the CO; (f) Metchnikowin-GFP fluorescence in a subpopulation of epithelial cells in the CO between Zones II and III; (h) Cecropin-GFP fluorescence in the secretory epithelium covering the SP but not in the fat body (fb); (i) Diptererin-GFP fluorescence in the SP duct (SPd); (j) Cecropin-GFP fluorescence in the lumen of the SP (SPI); (l) Defensin-GFP fluorescence in the proximal part of the SR (pSR), note the lack of fluorescence in the distal part of the SR (dSR) and in the distal part (dSR) of the SR. Note the fluorescence in the anterior domain of the UT (UTa) (marked by dotted line) where the pSR and the CO are connected. (n) Metchnikowin-GFP fluorescence in the pSR and dSR as shown for drosomycin in (m). Note that Metchnikowin fluorescence in the anterior part of the UT is excluded from the connection to the pSR (marked by dotted line). (B) Spatial localization of the different antimicrobial peptides within the female reproductive tract. A pair of fluorescent and transmitted confocal images is presented for each *Pep<sub>x</sub>-GFP* fly line. (a,b) Cecropin-GFP fluorescence is localized to the CO, SR, and SP; (c,d) Drosocin-GFP fluorescence is localized to the LO, CO, SR, and SP; (e,f) Defensin-GFP fluorescence is localized to the CO and SR; (g,h) Attacin-GFP fluorescence is localized to the LO, CO, SR, and UT; note the egg within the uterus; (i,j) Metchnikowin-GFP fluorescence is localized to the CO, spermathecal duct (SPd), SR and UT; (k,l) Diptererin-GFP fluorescence is localized to the LO, CO, SR, SPd, and the UT; (m,n) Drosomycin-GFP fluorescence is localized to the CO, SR, SP, and mainly to the anterior part of the UT. For each *Pep<sub>x</sub>-GFP* and mating status (unmated or mated),  $n \geq 20$  females. (Scale bar for GFP images, 20  $\mu\text{m}$  and for the summary models, 100  $\mu\text{m}$ .) (C) Topographic map of different antimicrobial peptides in the female reproductive tract. Spatial modeling of antimicrobial peptides: i) The Color Scale Index represents the combination of antimicrobial peptides that can be found in each domain. The same color in different domains indicates that the same combination of antimicrobial peptides is present in these domains. ii) The Gray Scale Color Intensity Level Index represents the number of antimicrobial peptides localized to a specific domain within the reproductive tract. The highest intensity level indicates all antimicrobial peptides examined, with the lighter shades of gray (leading to white) indicating six, five, four, and one antimicrobial peptide examined. Note that it is only at the calyx and the distal part of the seminal receptacle marked as dark brown that we can find all of the antimicrobial peptides examined. Schematic adapted from FlyBase image FBim0000248.





C

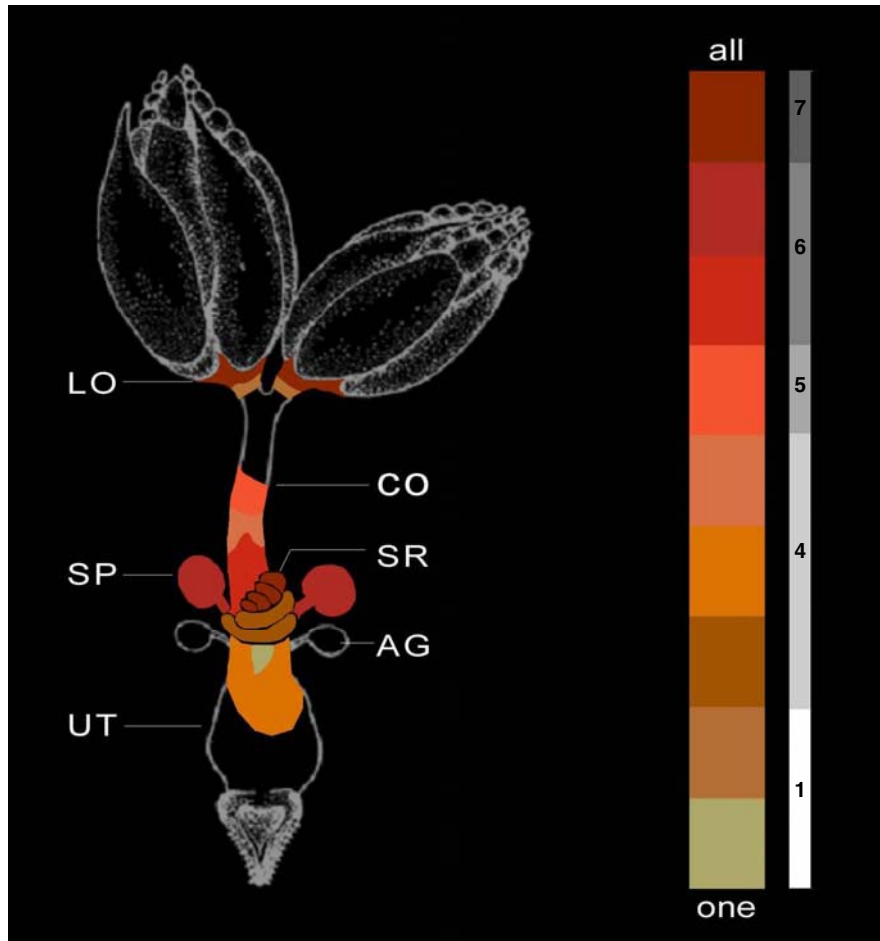

Fig. S6 cont.

**Table S1. GO analysis of oviduct gene products identified as present or mating-responsive**

| Dataset                                                        | Molecular function                                      | David<br><i>P</i> -value                              | FlyMine<br><i>P</i> -value | FuncAssociate<br><i>P</i> -adj |
|----------------------------------------------------------------|---------------------------------------------------------|-------------------------------------------------------|----------------------------|--------------------------------|
| Genes present in unmated (5011)                                | structural constituents of the ribosome                 | 1.70E-16                                              | 4.20E-63                   | <0.001                         |
|                                                                | RNA binding                                             | 5.50E-10                                              | 1.18E-36                   | <0.001                         |
|                                                                | protein binding                                         | 5.50E-12                                              | 3.18E-11                   | 0.001                          |
|                                                                | Transferase activity                                    | 3.20E-08                                              |                            |                                |
|                                                                | actin binding                                           | 1.50E-04                                              | 2.74E-18                   | 0.001                          |
|                                                                | Translation regulator activity                          | 5.20E-05                                              |                            | 0.001                          |
|                                                                | ATP binding                                             | 6.40E-07                                              |                            |                                |
|                                                                | oxidoreductase activity, acting on NADH or NADPH        | 1.30E-04                                              |                            |                                |
|                                                                | electron carrier activity                               | 1.40E-04                                              |                            |                                |
|                                                                | transporter activity                                    |                                                       | 2.65E-67                   | <0.001                         |
|                                                                | transcription activator activity                        |                                                       | 1.35E-14                   |                                |
|                                                                | regulation of cell shape                                |                                                       |                            | 0.027                          |
|                                                                | Genes that were detected only in unmated (53)           | inositol or phosphatidylinositol phosphatase activity |                            | 0.007                          |
| serine-type endopeptidase activity*                            |                                                         |                                                       | 0.08                       |                                |
| sugar transmembrane transporter activity*                      |                                                         |                                                       | 0.09                       |                                |
| Genes detected only in mated (198)                             | helicase activity                                       | 1.30E-03                                              | 5.90E-06                   |                                |
|                                                                | RNA binding                                             | 5.00E-04                                              | 0.0013                     |                                |
|                                                                | ATP-dependent helicase activity                         | 7.20E-03                                              | 0.011                      |                                |
| Cluster of up-regulated genes (8)                              | antibacterial humoral response (BP)                     | 1.80E-04                                              | 1.46E-09                   | <0.001                         |
| Proteins significantly expressed in oviduct (89)               | structural constituent of cytoskeleton                  | 1.70E-05                                              |                            |                                |
|                                                                | actin cytoskeleton organization and biogenesis          | 2.10E-04                                              | 3.44E-05                   | <0.001                         |
|                                                                | developmental process                                   |                                                       | 1.41E-13                   |                                |
|                                                                | muscle contraction                                      |                                                       |                            | <0.001                         |
| Up-regulated proteins (16)                                     | structural constituent of cytoskeleton                  | 1.50E-03                                              |                            |                                |
|                                                                | cytoskeletal protein binding                            |                                                       | 2.20E-06                   | <0.001                         |
|                                                                | actin binding                                           | 3.60E-02                                              |                            | <0.001                         |
|                                                                | ion binding                                             |                                                       | 0.0023                     |                                |
| Genes expressed only in oviduct and not in other datasets (80) | negative regulation of neurogenesis                     | 3.00E-02                                              |                            |                                |
|                                                                | protein tyrosine/serine/threonine phosphatase activity* | 0.07                                                  | 0.074                      |                                |

GO terms were considered as significantly enriched after correction for multiple hypothesis testing analyzed by David, FlyMine, and FuncAssociate; David, FlyMine - multiple corrections by Bonferoni; *P*-adj is the adjusted *p*-value, corrected for multiple hypothesis testing (fraction of 1,000 null-hypothesis simulations having attributes with this single-hypothesis *P* value or smaller).

\*Term was highly represented but not significant (*P* > 0.05).

**Table S3A. Oviduct mating-responsive proteins**

| FBgn        | CG#     | Protein name                             | Molecular function                         | Relative abundance (M/UM) | Concordance Score |
|-------------|---------|------------------------------------------|--------------------------------------------|---------------------------|-------------------|
| FBgn0005666 | CG1479  | Bent (Bt)                                | ATP binding                                | 6.25                      | P                 |
| FBgn0003470 | CG1977  | $\alpha$ -Spectrin                       | Actin binding                              | 6.00                      | I                 |
| FBgn0010434 | CG11949 | Coracle                                  | Actin binding                              | 5.83                      | P                 |
| FBgn0004873 | CG9325  | Adducin-like protein R1                  | Actin binding                              | 5.50                      | N                 |
| FBgn0010100 | CG9244  | Mitochondrial aconitase                  | Aconitate hydratase activity               | 5.25                      | N                 |
| FBgn0000667 | CG4376  | $\alpha$ -Actinin                        | Actin binding                              | 4.00                      | P                 |
| FBgn0003471 | CG5870  | $\beta$ -Spectrin                        | Actin binding                              | 4.00                      | P                 |
| FBgn0002968 | CG1634  | Neuroglian                               | Calcium ion binding                        | 3.50                      | P                 |
| FBgn0010397 | CG10119 | Lamin C                                  | Structural constituent of cytoskeleton     | 3.00                      | P                 |
| FBgn0016724 | CG11064 | Retinoid- and fatty-acid binding protein | Fatty acid binding                         | 2.88                      | P                 |
| FBgn0014863 | CG1019  | Muscle LIM protein at 84B                | Protein binding                            | 2.75                      | P                 |
| FBgn0001402 | CG33950 | Terrribly reduced optic lobes            | DNA binding                                | 2.63                      | N                 |
| FBgn0001219 | CG4264  | Heat shock protein cognate 4             | ATP binding                                | 2.56                      | P                 |
| FBgn0002527 | CG7123  | Laminin B1 chain                         | Structural molecule activity               | 2.50                      | P                 |
| FBgn0039737 | CG7920  | Ribosomal protein S8                     | 4-hydroxybutyrate CoA-transferase activity | 2.50                      | P                 |
| FBgn0003149 | CG5939  | Standard Paramyosin                      | Cytoskeletal protein binding               | 2.06                      | P                 |
| FBgn0002789 | CG4696  | Muscle protein 20                        | Actin binding                              | 0.50                      | P                 |

M, Mated female; UM, Unmated female; U, Up-regulated; D, Down-regulated; NC, No change; P, Positive (transcript was detected in unmated and mated female arrays); N, Negative (transcript was not detected in either unmated or mated female arrays); I, Intermediate (transcript was detected in mated or unmated female arrays).

Note that of the 16 up-regulated proteins, 12 had corresponding transcripts in both unmated and mated females arrays (P); for 3 proteins no transcript was observed in either unmated or mated females arrays (N); and for one protein the transcript was found in mated females arrays only (I); see also part C.

Table S3B. Proteins identified in the oviduct

| FBgn        | GG#     | Protein name                                          | Number of peptides |    |     |     |     |     | Relative abundance | Regulation | mRNA Presence |    | Concordance score |
|-------------|---------|-------------------------------------------------------|--------------------|----|-----|-----|-----|-----|--------------------|------------|---------------|----|-------------------|
|             |         |                                                       | M1                 | M2 | M3  | UM1 | UM2 | UM3 |                    |            | M             | UM |                   |
| FBgn0000667 | CG4376  | $\alpha$ -Actinin                                     | 6                  | 10 | 8   | 0   | 9   | 4   | 4.00               | U          | 1             | 1  | P                 |
| FBgn0001219 | CG4264  | Heat shock protein cognate 4                          | 7                  | 5  | 13  | 2   | 5   | 8   | 2.56               | U          | 1             | 1  | P                 |
| FBgn0002527 | CG7123  | Laminin B1 chain                                      | 2                  | 1  | 3   | 0   | 1   | 0   | 2.50               | U          | 1             | 1  | P                 |
| FBgn0002968 | CG1634  | Neuroglian                                            | 3                  | 4  | 4   | 1   | 7   | 1   | 3.50               | U          | 1             | 1  | P                 |
| FBgn0003149 | CG5939  | Standard paramyosin                                   | 28                 | 30 | 28  | 10  | 31  | 21  | 2.06               | U          | 1             | 1  | P                 |
| FBgn0003470 | CG1977  | $\alpha$ -Spectrin                                    | 7                  | 8  | 5   | 0   | 8   | 0   | 6.00               | U          | 0             | 1  | I                 |
| FBgn0003471 | CG5870  | $\beta$ -Spectrin                                     | 6                  | 6  | 4   | 1   | 5   | 2   | 4.00               | U          | 1             | 1  | P                 |
| FBgn0004873 | CG9325  | Adducin-like protein R1                               | 5                  | 2  | 6   | 0   | 5   | 1   | 5.50               | U          | 0             | 0  | N                 |
| FBgn0005666 | CG1479  | Bent                                                  | 6                  | 6  | 13  | 0   | 7   | 2   | 6.25               | U          | 1             | 1  | P                 |
| FBgn0010100 | CG9244  | Mitochondrial aconitase                               | 6                  | 4  | 9   | 1   | 5   | 2   | 5.25               | U          | 0             | 0  | N                 |
| FBgn0010397 | CG10119 | Lamin C                                               | 4                  | 3  | 4   | 1   | 4   | 2   | 3.00               | U          | 1             | 1  | P                 |
| FBgn0010434 | CG11949 | Coracle                                               | 7                  | 4  | 14  | 0   | 10  | 3   | 5.83               | U          | 1             | 1  | P                 |
| FBgn0014863 | CG1019  | Muscle LIM protein                                    | 3                  | 2  | 5   | 1   | 2   | 2   | 2.75               | U          | 1             | 1  | P                 |
| FBgn0016724 | CG11064 | Retinoid- and fatty-acid binding protein              | 4                  | 0  | 7   | 0   | 5   | 4   | 2.88               | U          | 1             | 1  | P                 |
| FBgn0039737 | CG7920  | Ribosomal protein S8                                  | 3                  | 4  | 6   | 1   | 6   | 3   | 2.50               | U          | 1             | 1  | P                 |
| FBgn0001402 | CG33950 | Terrribly reduced optic lobes                         | 4                  | 2  | 10  | 0   | 6   | 8   | 2.63               | U          | 0             | 0  | N                 |
| FBgn0000046 | CG18290 | Actin 87E                                             | 14                 | 14 | 15  | 14  | 12  | 11  | 1.27               | NC         | 0             | 0  | N                 |
| FBgn0000055 | CG32954 | ADH                                                   | 0                  | 0  | 4   | 0   | 0   | 2   | 1.00               | NC         | 1             | 1  | P                 |
| FBgn0000064 | CG6058  | Aldolase gamma                                        | 0                  | 2  | 2   | 0   | 1   | 2   | 1.30               | NC         | 1             | 1  | P                 |
| FBgn0000261 | CG6871  | Catalase                                              | 0                  | 1  | 6   | 0   | 2   | 1   | 0.75               | NC         | 1             | 1  | P                 |
| FBgn0000556 | CG8280  | Elongation factor 1 $\alpha$ 48D                      | 5                  | 6  | 8   | 2   | 6   | 6   | 1.91               | NC         | 1             | 1  | P                 |
| FBgn0000559 | CG2238  | Elongation factor 2b                                  | 0                  | 0  | 2   | 0   | 2   | 1   | 1.00               | NC         | 1             | 1  | P                 |
| FBgn0000579 | CG17654 | Enolase                                               | 0                  | 2  | 3   | 0   | 0   | 2   | 1.25               | NC         | 1             | 1  | P                 |
| FBgn0001092 | CG8893  | Glyceraldehyde 3 phosphate dehydrogenase 2            | 5                  | 3  | 8   | 5   | 4   | 6   | 0.87               | NC         | 1             | 1  | P                 |
| FBgn0001098 | CG5320  | Glutamate dehydrogenase                               | 0                  | 0  | 2   | 0   | 0   | 3   | 0.89               | NC         | 1             | 1  | P                 |
| FBgn0002526 | CG10236 | Laminin A                                             | 1                  | 2  | 7   | 0   | 2   | 1   | 1.00               | NC         | 1             | 1  | P                 |
| FBgn0002528 | CG3322  | Laminin B2                                            | 6                  | 5  | 3   | 0   | 6   | 4   | 0.79               | NC         | 1             | 1  | P                 |
| FBgn0002607 | CG2746  | RpL19                                                 | 1                  | 2  | 1   | 0   | 2   | 2   | 0.84               | NC         | 1             | 1  | P                 |
| FBgn0002741 | CG17927 | Myosin heavy chain                                    | 92                 | 84 | 104 | 56  | 91  | 70  | 1.56               | NC         | 1             | 1  | P                 |
| FBgn0002772 | CG5596  | Myosin alkali light chain 1                           | 4                  | 4  | 3   | 3   | 4   | 4   | 1.03               | NC         | 1             | 1  | P                 |
| FBgn0002773 | CG2184  | Myosin light chain 2                                  | 8                  | 10 | 6   | 9   | 11  | 2   | 0.90               | NC         | 1             | 1  | P                 |
| FBgn0002921 | CG5670  | Na pump $\alpha$ subunit                              | 13                 | 17 | 19  | 6   | 15  | 12  | 1.62               | NC         | 1             | 1  | P                 |
| FBgn0003274 | CG4918  | R Ribosomal protein                                   | 0                  | 0  | 4   | 0   | 0   | 2   | 1.00               | NC         | 1             | 1  | P                 |
| FBgn0003279 | CG5502  | Ribosomal protein L4                                  | 0                  | 2  | 2   | 0   | 1   | 2   | 1.00               | NC         | 1             | 1  | P                 |
| FBgn0003360 | CG16944 | ADP/ATP translocase                                   | 0                  | 2  | 4   | 2   | 1   | 6   | 0.58               | NC         | 1             | 1  | P                 |
| FBgn0003462 | CG11793 | Slow superoxide dismutase                             | 0                  | 0  | 2   | 0   | 0   | 3   | 0.89               | NC         | 1             | 1  | P                 |
| FBgn0003721 | CG4898  | Tropomyosin 1                                         | 15                 | 14 | 20  | 28  | 17  | 18  | 0.67               | NC         | 0             | 0  | N                 |
| FBgn0003884 | CG1913  | $\alpha$ -Tubulin84B                                  | 7                  | 7  | 5   | 2   | 9   | 8   | 0.70               | NC         | 1             | 1  | P                 |
| FBgn0003887 | CG9277  | Tubulin at 56D                                        | 4                  | 6  | 13  | 3   | 7   | 8   | 1.09               | NC         | 1             | 1  | P                 |
| FBgn0003887 | CG9277  | Succinyl coenzyme A synthetase flavoprotein subunit   | 1                  | 2  | 2   | 0   | 3   | 2   | 0.89               | NC         | 1             | 1  | P                 |
| FBgn0003942 | CG5271  | Ribosomal protein S27A                                | 0                  | 0  | 3   | 0   | 0   | 2   | 1.17               | NC         | 1             | 1  | P                 |
| FBgn0004028 | CG7178  | Troponin-I wings-up A                                 | 7                  | 7  | 8   | 4   | 7   | 7   | 1.07               | NC         | 1             | 1  | P                 |
| FBgn0004047 | CG11129 | Yolk protein 3                                        | 1                  | 1  | 2   | 0   | 2   | 2   | 0.84               | NC         | 1             | 1  | P                 |
| FBgn0004117 | CG4843  | Tropomyosin 2                                         | 15                 | 14 | 20  | 20  | 19  | 18  | 0.75               | NC         | 1             | 1  | P                 |
| FBgn0004169 | CG7107  | Troponin T-1                                          | 13                 | 11 | 6   | 15  | 16  | 5   | 0.68               | NC         | 1             | 1  | P                 |
| FBgn0004363 | CG6647  | Porin                                                 | 4                  | 6  | 1   | 4   | 5   | 4   | 1.10               | NC         | 1             | 1  | P                 |
| FBgn0004432 | CG9916  | Cyclophilin 1                                         | 0                  | 1  | 3   | 2   | 1   | 2   | 1.25               | NC         | 1             | 1  | P                 |
| FBgn0004551 | CG3725  | Calcium ATPase at 60A                                 | 2                  | 3  | 2   | 0   | 3   | 1   | 1.50               | NC         | 1             | 1  | P                 |
| FBgn0004922 | CG10944 | Ribosomal protein S6                                  | 0                  | 1  | 3   | 0   | 2   | 2   | 1.00               | NC         | 1             | 1  | P                 |
| FBgn0005391 | CG2979  | Yolk protein 2                                        | 2                  | 1  | 12  | 2   | 1   | 9   | 1.00               | NC         | 1             | 1  | P                 |
| FBgn0005671 | CG17369 | Vacuolar H + ATP synthase subunit B                   | 0                  | 2  | 3   | 0   | 2   | 3   | 1.00               | NC         | 1             | 1  | P                 |
| FBgn0010217 | CG11154 | ATP synthase $\beta$                                  | 7                  | 13 | 3   | 9   | 7   | 7   | 0.61               | NC         | 1             | 1  | P                 |
| FBgn0010410 | CG15442 | Ribosomal protein L27A                                | 1                  | 2  | 2   | 1   | 1   | 2   | 1.30               | NC         | 1             | 1  | P                 |
| FBgn0010424 | CG7930  | Troponin C 73F                                        | 3                  | 4  | 3   | 4   | 3   | 3   | 1.03               | NC         | 1             | 1  | P                 |
| FBgn0010620 | CG10939 | SRY interacting protein 1                             | 3                  | 4  | 3   | 2   | 3   | 0   | 1.42               | NC         | 0             | 0  | N                 |
| FBgn0011211 | CG3612  | Mitochondrial ATP synthase $\alpha$ subunit precursor | 6                  | 9  | 8   | 6   | 4   | 8   | 1.00               | NC         | 1             | 1  | P                 |
| FBgn0011272 | CG4651  | Ribosomal protein L13                                 | 1                  | 0  | 3   | 0   | 1   | 2   | 1.16               | NC         | 1             | 1  | P                 |

| FBgn        | GG#     | Protein name                             | Number of peptides |    |    |     |     |     | Relative abundance | Regulation | mRNA Presence |    | Concordance score |
|-------------|---------|------------------------------------------|--------------------|----|----|-----|-----|-----|--------------------|------------|---------------|----|-------------------|
|             |         |                                          | M1                 | M2 | M3 | UM1 | UM2 | UM3 |                    |            | M             | UM |                   |
| FBgn0011643 | CG3220  | Muscle LIM protein 1                     | 2                  | 1  | 1  | 1   | 1   | 2   | 1.16               | NC         | 1             | 0  | I                 |
| FBgn0011661 | CG10701 | Moesin                                   | 4                  | 3  | 2  | 2   | 4   | 2   | 0.88               | NC         | 1             | 1  | P                 |
| FBgn0012036 | CG3752  | Aldehyde dehydrogenase                   | 0                  | 0  | 2  | 0   | 0   | 2   | 1.00               | NC         | 0             | 0  | N                 |
| FBgn0013770 | CG6692  | Cysteine proteinase-1                    | 0                  | 0  | 3  | 1   | 0   | 3   | 1.00               | NC         | 1             | 1  | P                 |
| FBgn0014002 | CG6988  | Protein disulfide isomerase              | 1                  | 1  | 5  | 1   | 1   | 4   | 1.08               | NC         | 1             | 1  | P                 |
| FBgn0017545 | CG2168  | Ribosomal protein S3A                    | 1                  | 0  | 2  | 0   | 1   | 2   | 1.00               | NC         | 1             | 1  | P                 |
| FBgn0017579 | CG6253  | Ribosomal protein L14                    | 1                  | 0  | 6  | 0   | 0   | 3   | 1.00               | NC         | 1             | 1  | P                 |
| FBgn0020367 | CG3762  | Vha68-2                                  | 2                  | 6  | 4  | 1   | 5   | 7   | 1.60               | NC         | 0             | 0  | N                 |
| FBgn0020618 | CG7111  | Receptor of activated protein kinase C 1 | 1                  | 0  | 4  | 0   | 1   | 2   | 1.00               | NC         | 1             | 1  | P                 |
| FBgn0020910 | CG4863  | Ribosomal protein L3                     | 1                  | 0  | 4  | 0   | 0   | 3   | 1.11               | NC         | 1             | 1  | P                 |
| FBgn0026403 | CG12908 | Nidogen/entactin                         | 0                  | 1  | 3  | 0   | 2   | 2   | 1.00               | NC         | 0             | 0  | N                 |
| FBgn0027527 | CG1151  | Osiris 6                                 | 2                  | 2  | 1  | 1   | 2   | 1   | 1.40               | NC         | 0             | 0  | N                 |
| FBgn0028479 | CG4389  | CG4389                                   | 0                  | 0  | 2  | 0   | 1   | 2   | 1.00               | NC         | 1             | 1  | P                 |
| FBgn0029176 | CG11901 | Elongation factor 1, gamma chain         | 0                  | 0  | 4  | 0   | 1   | 2   | 1.00               | NC         | 0             | 0  | N                 |
| FBgn0032422 | CG6579  | CG6579                                   | 0                  | 0  | 2  | 0   | 0   | 2   | 1.00               | NC         | 1             | 1  | P                 |
| FBgn0032518 | CG9282  | Ribosomal protein L24                    | 1                  | 0  | 2  | 0   | 1   | 2   | 1.00               | NC         | 1             | 1  | P                 |
| FBgn0032897 | CG9336  | CG9336                                   | 0                  | 2  | 4  | 0   | 1   | 2   | 1.50               | NC         | 1             | 1  | P                 |
| FBgn0032899 | CG9338  | CG9338                                   | 1                  | 0  | 4  | 4   | 1   | 3   | 1.17               | NC         | 1             | 1  | P                 |
| FBgn0033919 | CG8547  | CG8547                                   | 2                  | 2  | 0  | 0   | 1   | 0   | 1.50               | NC         | 1             | 1  | P                 |
| FBgn0034603 | CG9480  | Glycogenin                               | 3                  | 5  | 2  | 2   | 6   | 2   | 1.11               | NC         | 0             | 0  | N                 |
| FBgn0035753 | CG8615  | Ribosomal protein L18                    | 0                  | 0  | 2  | 0   | 0   | 2   | 1.00               | NC         | 1             | 1  | P                 |
| FBgn0035917 | CG6416  | CG6416                                   | 2                  | 2  | 3  | 4   | 1   | 2   | 1.75               | NC         | 1             | 1  | P                 |
| FBgn0036279 | CG43567 | Sodium chloride cotransporter 69         | 6                  | 3  | 2  | 1   | 3   | 1   | 1.50               | NC         | 1             | 1  | P                 |
| FBgn0036682 | CG11661 | RE42354p                                 | 2                  | 0  | 2  | 0   | 1   | 3   | 0.83               | NC         | 1             | 1  | P                 |
| FBgn0037245 | CG14648 | CG14648                                  | 1                  | 2  | 1  | 0   | 2   | 0   | 1.00               | NC         | 1             | 1  | P                 |
| FBgn0038587 | CG7998  | CG7998                                   | 0                  | 0  | 5  | 0   | 0   | 3   | 1.00               | NC         | 1             | 1  | P                 |
| FBgn0039713 | CG7808  | Ribosomal protein S8                     | 1                  | 2  | 5  | 0   | 3   | 3   | 0.83               | NC         | 1             | 1  | P                 |
| FBgn0040813 | CG11051 | Neuropeptide-like precursor 2            | 0                  | 0  | 2  | 0   | 0   | 2   | 1.00               | NC         | 1             | 1  | P                 |
| FBgn0053859 | CG33859 | Histone 2A                               | 0                  | 1  | 3  | 0   | 0   | 2   | 1.17               | NC         | 0             | 0  | N                 |
| FBgn0053861 | CG33861 | Histone 1                                | 1                  | 1  | 2  | 0   | 2   | 0   | 0.75               | NC         | 0             | 0  | N                 |
| FBgn0053868 | CG33868 | Histone H2B                              | 1                  | 1  | 3  | 0   | 0   | 3   | 1.00               | NC         | 0             | 0  | N                 |
| FBgn0002789 | CG4696  | Muscle protein 20                        | 0                  | 0  | 2  | 2   | 2   | 1   | 0.50               | D          | 1             | 1  | P                 |

M, Mated female; UM, Unmated female; U, Up-regulated; D, Down-regulated; NC, No change; P, Positive (transcript was detected in unmated and mated female arrays); N, Negative (transcript was not detected in either unmated or mated female arrays); I, Intermediate (transcript was detected in mated or unmated female arrays).

Table S3C. Validation

Representative Western blot images of oviduct mating-responsive proteins

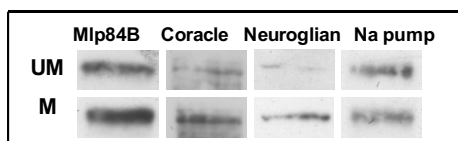

Relative abundance of oviduct mating-responsive proteins in mated vs. unmated oviducts

| Protein name              | Relative abundance (MudPIT) | Relative abundance (Western blot) | Regulation | No. of identified peptides | Coverage, % |
|---------------------------|-----------------------------|-----------------------------------|------------|----------------------------|-------------|
| Coracle                   | 5.8                         | 1.9                               | U          | 25                         | 22          |
| Adducin                   | 5.5                         | 2                                 | U          | 13                         | 28          |
| Neuroglian                | 3.5                         | 3.2                               | U          | 11                         | 14          |
| Muscle LIM protein at 84B | 2.75                        | 2.79                              | U          | 6                          | 24          |
| Na pump $\alpha$ subunit  | 1.62                        | 1                                 | NC         | 32                         | 38          |

M, Mated female; UM, Unmated female; U, Up-regulated; D, Down-regulated; NC, No change; P, Positive (transcript was detected in unmated and mated female arrays); N, Negative (transcript was not detected in either unmated or mated female arrays); I, Intermediate (transcript was detected in mated or unmated female arrays).

Note that of the 16 up-regulated proteins, 12 had corresponding transcripts in both unmated and mated females arrays (P); for 3 proteins no transcript was observed in either unmated or mated females arrays (N); and for one protein the transcript was found in mated females arrays only (I); see also part C.

**Table S5. Characteristic path length (CPL) of protein–protein interaction (PPI) subnetworks for oviduct-expressed transcripts or proteins compared with random sets**

| Network and subnetwork                                               | Oviduct gene set         | Size of set | Observed CPL | Mean CPL of random sets (1,000) | SD of random sets (1,000) | z score      | Mean CPL of random sets (1,000; same bait/prey ratio) | SD of random sets (1,000; same bait/prey ratio) | z score      |
|----------------------------------------------------------------------|--------------------------|-------------|--------------|---------------------------------|---------------------------|--------------|-------------------------------------------------------|-------------------------------------------------|--------------|
| <b>Dm PPI map</b>                                                    |                          |             |              |                                 |                           |              |                                                       |                                                 |              |
| Full network                                                         |                          | 5394        | 6.41         | NA                              | NA                        | NA           | NA                                                    | NA                                              | NA           |
| Present                                                              | Proteins                 | 56          | 5.16         | 6.41                            | 0.35                      | <b>-3.55</b> | 6.15                                                  | 0.34                                            | <b>-2.93</b> |
| Up-regulated (Up)                                                    | (detected by MudPIT)     | 12          | 3.91         | 6.36                            | 0.79                      | <b>-3.11</b> | 6.01                                                  | 0.71                                            | <b>-2.97</b> |
| Present NNN                                                          |                          | 223         | 4.71         | 5.36                            | 0.42                      | -1.53        | 5.25                                                  | 0.40                                            | -1.35        |
| Up NNN                                                               |                          | 61          | 3.78         | 5.11                            | 0.87                      | -1.54        | 4.92                                                  | 0.74                                            | -1.54        |
| Differentially expr. (DE)                                            | Transcripts              | 84          | 6.70         | 6.39                            | 0.29                      | 1.06         | 6.45                                                  | 0.28                                            | 0.89         |
| Up                                                                   | (detected by microarray) | 68          | 6.84         | 6.41                            | 0.32                      | 1.36         | 6.46                                                  | 0.32                                            | 1.20         |
| Down-regulated (Down)                                                |                          | 16          | 6.34         | 6.43                            | 0.65                      | -0.14        | 6.41                                                  | 0.61                                            | -0.13        |
| DE NNN                                                               |                          | 234         | 5.74         | 5.41                            | 0.35                      | 0.94         | 5.47                                                  | 0.36                                            | 0.77         |
| Up NNN                                                               |                          | 190         | 5.67         | 5.38                            | 0.40                      | 0.72         | 5.43                                                  | 0.41                                            | 0.58         |
| Down NNN                                                             |                          | 64          | 4.83         | 5.16                            | 0.77                      | -0.42        | 5.24                                                  | 0.73                                            | -0.56        |
| <b>Dm PPI map plus interologs (inParanoid orthologs)</b>             |                          |             |              |                                 |                           |              |                                                       |                                                 |              |
| Full Network                                                         |                          | 6019        | 5.91         | NA                              | NA                        | NA           | NA                                                    | NA                                              | NA           |
| Present                                                              | Proteins                 | 65          | 5.12         | 6.41                            | 0.35                      | <b>-3.65</b> | 5.65                                                  | 0.24                                            | <b>-2.22</b> |
| Up                                                                   | (detected by MudPIT)     | 12          | 3.65         | 6.36                            | 0.79                      | <b>-3.43</b> | 5.63                                                  | 0.54                                            | <b>-3.64</b> |
| Present NNN                                                          |                          | 333         | 4.62         | 5.01                            | 0.28                      | -1.40        | 4.90                                                  | 0.25                                            | -1.08        |
| Up NNN                                                               |                          | 94          | 3.57         | 4.76                            | 0.61                      | -1.93        | 4.61                                                  | 0.56                                            | -1.84        |
| DE                                                                   | Transcripts              | 97          | 5.92         | 6.41                            | 0.27                      | -1.76        | 5.90                                                  | 0.20                                            | 0.14         |
| Up                                                                   | (detected by microarray) | 79          | 5.83         | 6.41                            | 0.29                      | -2.00        | 5.85                                                  | 0.22                                            | -0.10        |
| Down                                                                 |                          | 18          | 6.41         | 6.42                            | 0.67                      | -0.02        | 6.11                                                  | 0.46                                            | 0.65         |
| DE NNN                                                               |                          | 324         | 5.27         | 5.06                            | 0.23                      | 0.91         | 5.04                                                  | 0.22                                            | 1.04         |
| Up NNN                                                               |                          | 273         | 5.14         | 5.04                            | 0.26                      | 0.35         | 4.97                                                  | 0.24                                            | 0.69         |
| Down NNN                                                             |                          | 71          | 4.88         | 4.86                            | 0.58                      | 0.04         | 4.91                                                  | 0.52                                            | -0.06        |
| <b>Dm PPI map without ribosome and vacuolar H + ATPase</b>           |                          |             |              |                                 |                           |              |                                                       |                                                 |              |
| Full network                                                         |                          | 5320        | 6.25         | NA                              | NA                        | NA           | NA                                                    | NA                                              | NA           |
| Present                                                              | Proteins                 | 56          | 5.17         | 6.40                            | 0.34                      | <b>-3.65</b> | 6.12                                                  | 0.33                                            | <b>-2.92</b> |
| Up                                                                   | (detected by MudPIT)     | 12          | 3.91         | 6.38                            | 0.77                      | <b>-3.22</b> | 5.95                                                  | 0.67                                            | <b>-3.05</b> |
| Present NNN                                                          |                          | 218         | 4.75         | 5.36                            | 0.44                      | -1.37        | 5.22                                                  | 0.40                                            | -1.19        |
| Up NNN                                                               |                          | 59          | 3.79         | 5.04                            | 0.84                      | -1.49        | 4.90                                                  | 0.80                                            | -1.38        |
| DE                                                                   | Transcripts              | 82          | 6.77         | 6.38                            | 0.29                      | 1.30         | 6.42                                                  | 0.29                                            | 1.21         |
| Up                                                                   | (detected by microarray) | 66          | 6.93         | 6.41                            | 0.34                      | 1.57         | 6.41                                                  | 0.32                                            | 1.65         |
| Down                                                                 |                          | 16          | 6.34         | 6.41                            | 0.69                      | -0.10        | 6.38                                                  | 0.57                                            | -0.07        |
| DE NNN                                                               |                          | 226         | 5.78         | 5.40                            | 0.38                      | 0.98         | 5.43                                                  | 0.35                                            | 1.01         |
| Up NNN                                                               |                          | 182         | 5.71         | 5.37                            | 0.40                      | 0.83         | 5.39                                                  | 0.41                                            | 0.77         |
| Down NNN                                                             |                          | 64          | 4.83         | 5.13                            | 0.75                      | -0.39        | 5.17                                                  | 0.69                                            | -0.49        |
| <b>Dm PPI interolog map without ribosome and vacuolar H + ATPase</b> |                          |             |              |                                 |                           |              |                                                       |                                                 |              |
| Full network                                                         |                          | 5929        | 5.93         | NA                              | NA                        | NA           | NA                                                    | NA                                              | NA           |
| Present                                                              | Proteins                 | 64          | 5.09         | 6.41                            | 0.34                      | <b>-3.83</b> | 5.66                                                  | 0.24                                            | <b>-2.39</b> |
| Up                                                                   | (detected by MudPIT)     | 12          | 3.65         | 6.36                            | 0.79                      | <b>-3.43</b> | 5.63                                                  | 0.55                                            | <b>-3.58</b> |
| Present NNN                                                          |                          | 326         | 4.63         | 5.03                            | 0.29                      | -1.39        | 4.89                                                  | 0.25                                            | -1.07        |
| Up NNN                                                               |                          | 92          | 3.57         | 4.77                            | 0.64                      | -1.89        | 4.60                                                  | 0.54                                            | -1.91        |
| DE                                                                   | Transcripts              | 94          | 5.90         | 6.42                            | 0.27                      | -1.93        | 5.89                                                  | 0.20                                            | 0.07         |
| Up                                                                   | (detected by microarray) | 76          | 5.80         | 6.41                            | 0.31                      | -1.96        | 5.84                                                  | 0.23                                            | -0.18        |
| Down                                                                 |                          | 18          | 6.41         | 6.42                            | 0.67                      | -0.02        | 6.12                                                  | 0.45                                            | 0.63         |
| DE NNN                                                               |                          | 314         | 5.27         | 5.08                            | 0.24                      | 0.79         | 5.04                                                  | 0.21                                            | 1.06         |
| Up NNN                                                               |                          | 263         | 5.13         | 5.05                            | 0.27                      | 0.28         | 4.97                                                  | 0.24                                            | 0.65         |
| Down NNN                                                             |                          | 71          | 4.88         | 4.85                            | 0.53                      | 0.07         | 4.91                                                  | 0.54                                            | -0.05        |





## Other Supporting Information Files

[Table S2 \(XLS\)](#)

[Table S4 \(XLS\)](#)
